# Supplementary material for: MicroRNA-126 engineered muscle-derived stem cells attenuates cavernosa injury-induced erectile dysfunction in rats
Source: publisher site journal article supplement (doi:10.18632/aging.203057), 2021-05-23
Supplement: Supplementary file [file aging-v13i10-203057-supplementary-material-SD1.pdf]

## SUPPLEMENTARY FIGURES

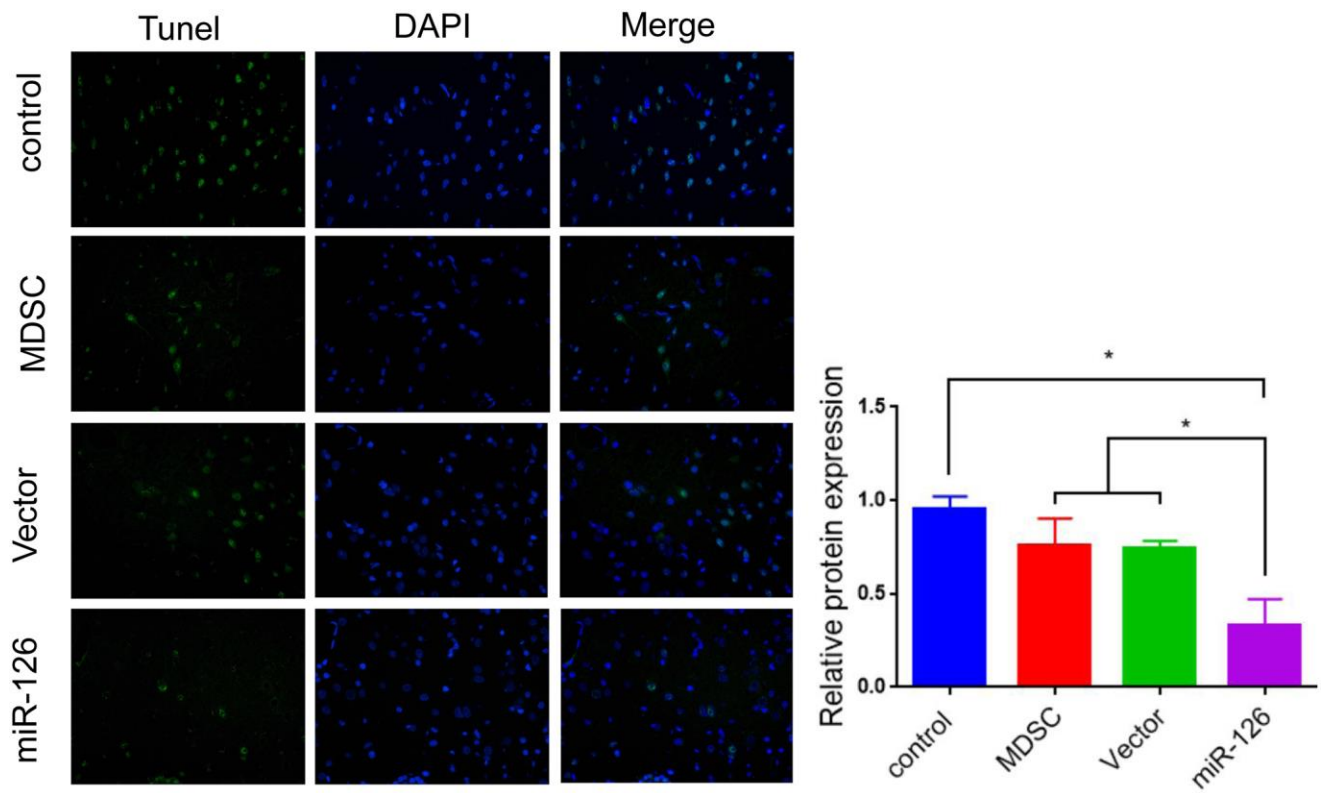

**Supplementary Figure 1. miR-126-overexpressing MDSCs improved necrosis of penis tissue.** TUNNEL staining for the detection of the degree of tissue necrosis. Data are shown as the means  $\pm$  SD. \* $P < 0.05$ , \*\* $P < 0.01$ .

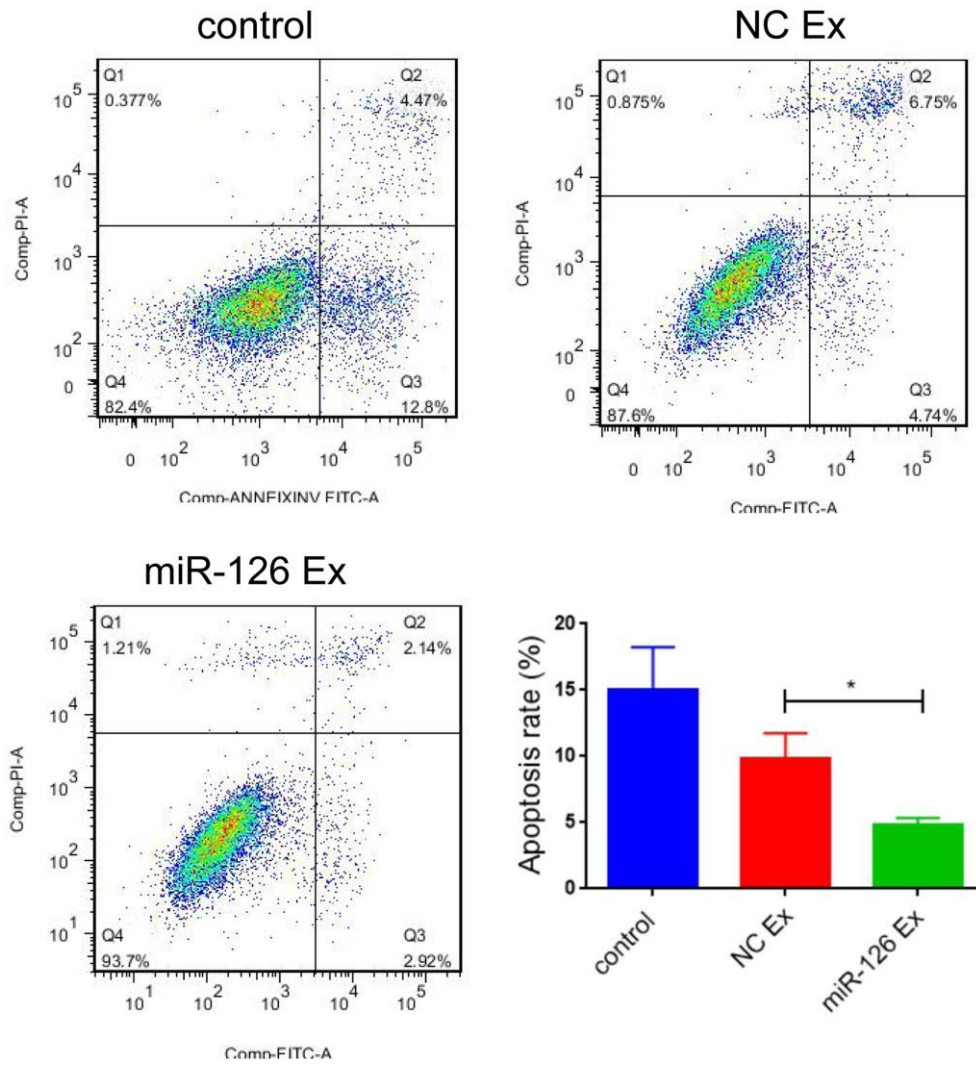

**Supplementary Figure 2. Exosomes derived from miR-126-modified MDSCs inhibits apoptosis in HUVECs.** The cell apoptosis rate by a FITC Annexin V apoptosis detection kit. Data are shown as the means  $\pm$  SD. \* $P < 0.05$ , \*\* $P < 0.01$ .

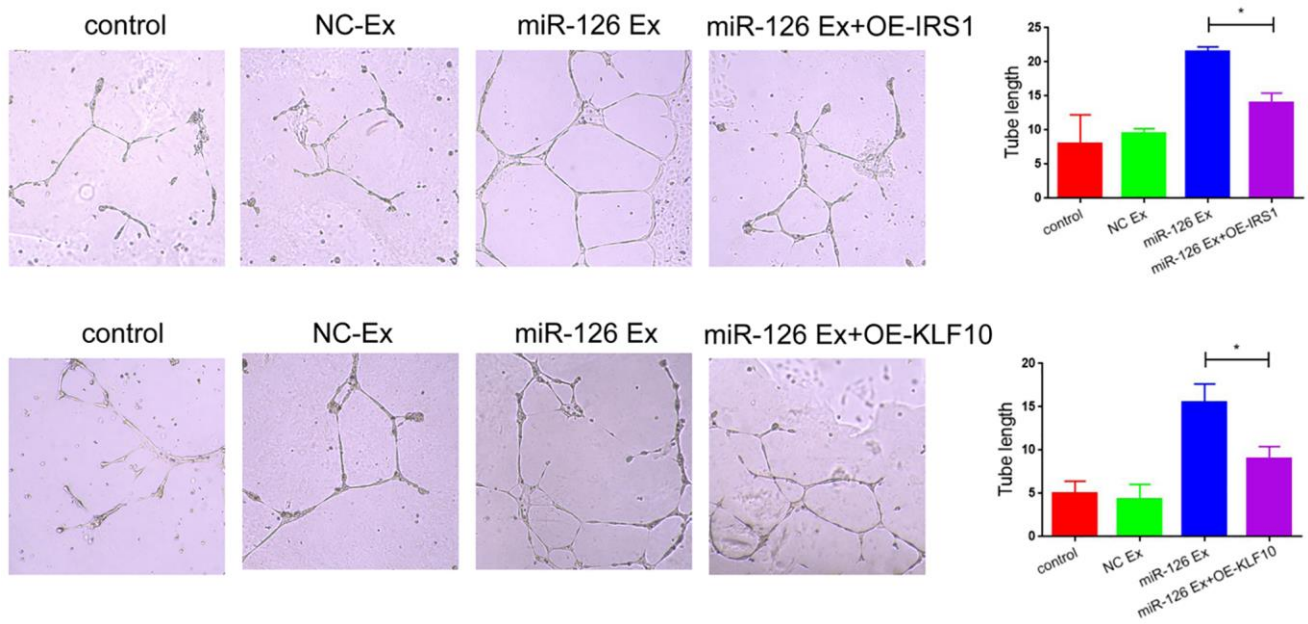

**Supplementary Figure 3. Overexpression of IRS1 and KLF10 attenuates the improvement of miR-126 on angiogenesis.** Photomicrographs of tube-like structures and quantification of the tube number. Data are shown as the means  $\pm$  SD. \* $P < 0.05$ , \*\* $P < 0.01$ .
